# Supplementary material for: The Process-Interaction-Model: a common representation of rule-based and logical models allows studying signal transduction on different levels of detail
Source: PubMed Central journal article supplement (PMC3598730; doi:10.1186/1471-2105-13-251), 2012-09-28
Supplement: 1471-2105-13-251-S1.pdf [file 1471-2105-13-251-S1.pdf]

| reaction rule               |   |             |   |                             | P-Num     |    |
|-----------------------------|---|-------------|---|-----------------------------|-----------|----|
| IR(0, 0, *, *)              | + | Ins         | ↔ | IR(I, 0, *, *)              | k1, k-1   | 1  |
| IR(0, 0, *, *)              | + | Ins         | ↔ | IR(0, I, *, *)              | k1, k-1   | 2  |
| IR(I, 0, *, *)              | + | Ins         | ↔ | IR(I, I, *, *)              | k2, k-2   | 2  |
| IR(0, I, *, *)              | + | Ins         | ↔ | IR(I, I, *, *)              | k2, k-2   | 1  |
| IR(0, 0, 0, *)              |   |             | ↔ | IR(0, 0, P, *)              | k3, k-3   | 3  |
| IR(I, 0, 0, *)              |   |             | ↔ | IR(I, 0, P, *)              | k4, k-4   | 3  |
| IR(0, I, 0, *)              |   |             | ↔ | IR(0, I, P, *)              | k4, k-4   | 3  |
| IR(I, I, 0, *)              |   |             | ↔ | IR(I, I, P, *)              | k5, k-5   | 3  |
| IR(*, *, P, *)              | + | Shc(*)      | ↔ | IR(*, *, Shc(*), *)         | k6, k-6   | 5  |
| IR(I, I, Shc(0), *)         |   |             | ↔ | IR(I, I, Shc(P), *)         | k7, k-7   | 6  |
| IR(*, *, Shc(P), *)         | + | Grb2(*)     | ↔ | IR(*, *, Grb2(*), *)        | k8, k-8   | 7  |
| IR(*, *, Grb2(0), *)        | + | SOS(0)      | ↔ | IR(*, *, SOS(0), *)         | k9, k-9   | 8  |
| IR(*, *, Grb2(0), *)        | + | SOS(P)      | ↔ | IR(*, *, SOS(P), *)         | k10, k-10 | 8  |
| IR(*, *, SOS(0), *)         |   |             | ↔ | IR(*, *, SOS(P), *)         | k11, k-11 | 9  |
| IR(0, 0, *, 0)              |   |             | ↔ | IR(0, 0, *, P)              | k12, k-12 | 4  |
| IR(I, 0, *, 0)              |   |             | ↔ | IR(I, 0, *, P)              | k13, k-13 | 4  |
| IR(0, I, *, 0)              |   |             | ↔ | IR(0, I, *, P)              | k13, k-13 | 4  |
| IR(I, I, *, 0)              |   |             | ↔ | IR(I, I, *, P)              | k14, k-14 | 4  |
| IR(*, *, *, P)              | + | IRS(*)      | ↔ | IR(*, *, *, IRS(*))         | k15, k-15 | 10 |
| IR(I, I, *, IRS(0))         |   |             | ↔ | IR(I, I, *, IRS(P))         | k16, k-16 | 11 |
| IR(*, *, *, IRS(P))         | + | Grb2(*)     | ↔ | IR(*, *, *, Grb2(*))        | k17, k-17 | 12 |
| IR(*, *, *, Grb2(0))        | + | SOS(0)      | ↔ | IR(*, *, *, SOS(0))         | k9, k-9   | 8  |
| IR(*, *, *, Grb2(0))        | + | SOS(P)      | ↔ | IR(*, *, *, SOS(P))         | k10, k-10 | 8  |
| IR(*, *, *, SOS(0))         |   |             | ↔ | IR(*, *, *, SOS(P))         | k11, k-11 | 9  |
| Shc(0)                      |   |             | ↔ | Shc(P)                      | k18, k-18 | 6  |
| Shc(P)                      | + | Grb2(*)     | ↔ | Shc(Grb2(*))                | k8, k-8   | 7  |
| Shc(Grb2(0))                | + | SOS(0)      | ↔ | Shc(SOS(0))                 | k9, k-9   | 8  |
| Shc(Grb2(0))                | + | SOS(P)      | ↔ | Shc(SOS(P))                 | k10, k-10 | 8  |
| Shc(SOS(0))                 |   |             | ↔ | Shc(SOS(P))                 | k11, k-11 | 9  |
| Grb2(0)                     | + | SOS(0)      | ↔ | Grb2(SOS(0))                | k9, k-9   | 8  |
| Grb2(0)                     | + | SOS(P)      | ↔ | Grb2(SOS(P))                | k10, k-10 | 8  |
| Grb2(SOS(0))                |   |             | ↔ | Grb2(SOS(P))                | k11, k-11 | 9  |
| SOS(0)                      |   |             | ↔ | SOS(P)                      | k19, k-19 | 9  |
| IRS(0)                      |   |             | ↔ | IRS(P)                      | k20, k-20 | 11 |
| IRS(P)                      | + | Grb2(*)     | ↔ | IRS(Grb2(*))                | k17, k-17 | 12 |
| IRS(Grb2(0))                | + | SOS(0)      | ↔ | IRS(SOS(0))                 | k9, k-9   | 8  |
| IRS(Grb2(0))                | + | SOS(P)      | ↔ | IRS(SOS(P))                 | k10, k-10 | 8  |
| IRS(SOS(0))                 |   |             | ↔ | IRS(SOS(P))                 | k11, k-11 | 9  |
| ER(0, *, *)                 | + | EGF         | ↔ | ER(E, *, *)                 | k21, k-21 | 13 |
| ER(*, 0, *)                 |   |             | ↔ | ER(*, P, *)                 | k22, k-22 | 14 |
| ER(*, P, *)                 | + | Shc(*)      | ↔ | ER(*, Shc(*), *)            | k23, k-23 | 15 |
| ER(*, Shc(0), *)            |   |             | ↔ | ER(*, Shc(P), *)            | k24, k-24 | 6  |
| ER(*, Shc(P), *)            | + | Grb2(*)     | ↔ | ER(*, Grb2(*), *)           | k8, k-8   | 7  |
| ER(*, Grb2(0), *)           | + | SOS(0)      | ↔ | ER(*, SOS(0), *)            | k9, k-9   | 8  |
| ER(*, Grb2(0), *)           | + | SOS(P)      | ↔ | ER(*, SOS(P), *)            | k10, k-10 | 8  |
| ER(*, SOS(0), *)            |   |             | ↔ | ER(*, SOS(P), *)            | k11, k-11 | 9  |
| ER(*, *, 0)                 |   |             | ↔ | ER(*, *, P)                 | k25, k-25 | 16 |
| ER(*, *, P)                 | + | Grb2(*)     | ↔ | ER(*, *, Grb2(*))           | k26, k-26 | 17 |
| ER(*, *, Grb2(0))           | + | SOS(0)      | ↔ | ER(*, *, SOS(0))            | k9, k-9   | 8  |
| ER(*, *, Grb2(0))           | + | SOS(P)      | ↔ | ER(*, *, SOS(P))            | k10, k-10 | 8  |
| ER(*, *, SOS(0))            |   |             | ↔ | ER(*, *, SOS(P))            | k11, k-11 | 9  |
| ER(E, *, *)                 | + | ER(0, *, *) | ↔ | ER2(E, *, *, 0, *, *)       | k27, k-27 | 18 |
| ER(0, *, *)                 | + | ER(0, *, *) | ↔ | ER2(0, *, *, 0, *, *)       | k28, k-28 | 18 |
| ER(E, *, *)                 | + | ER(E, *, *) | ↔ | ER2(E, *, *, E, *, *)       | k29, k-29 | 18 |
| ER2(0, *, *, *, *, *)       | + | EGF         | ↔ | ER2(E, *, *, *, *, *)       | k30, k-30 | 13 |
| ER2(*, 0, *, *, *, *)       |   |             | ↔ | ER2(*, P, *, *, *, *)       | k31, k-31 | 14 |
| ER2(*, Shc(0), *, *, *, *)  |   |             | ↔ | ER2(*, Shc(P), *, *, *, *)  | k32, k-32 | 6  |
| ER2(*, P, *, *, *, *)       | + | Shc(*)      | ↔ | ER2(*, Shc(*), *, *, *, *)  | k23, k-23 | 15 |
| ER2(*, Shc(P), *, *, *, *)  | + | Grb2(*)     | ↔ | ER2(*, Grb2(*), *, *, *, *) | k8, k-8   | 7  |
| ER2(*, Grb2(0), *, *, *, *) | + | SOS(0)      | ↔ | ER2(*, SOS(0), *, *, *, *)  | k9, k-9   | 8  |
| ER2(*, Grb2(0), *, *, *, *) | + | SOS(P)      | ↔ | ER2(*, SOS(P), *, *, *, *)  | k10, k-10 | 8  |
| ER2(*, SOS(0), *, *, *, *)  |   |             | ↔ | ER2(*, SOS(P), *, *, *, *)  | k11, k-11 | 9  |
| ER2(*, *, 0, *, *, *)       |   |             | ↔ | ER2(*, *, 0, *, *, *)       | k33, k-33 | 16 |
| ER2(*, *, P, *, *, *)       | + | Grb2(*)     | ↔ | ER2(*, *, Grb2(*), *, *, *) | k34, k-34 | 17 |
| ER2(*, *, Grb2(0), *, *, *) | + | SOS(0)      | ↔ | ER2(*, *, SOS(0), *, *, *)  | k9, k-9   | 8  |
| ER2(*, *, Grb2(0), *, *, *) | + | SOS(P)      | ↔ | ER2(*, *, SOS(P), *, *, *)  | k10, k-10 | 8  |
| ER2(*, SOS(0), *, *, *, *)  |   |             | ↔ | ER2(*, *, SOS(P), *, *, *)  | k11, k-11 | 9  |

Figure 1: Rule-based model of EGF insulin crosstalk (adopted from [7]); last column corresponds process number in  $\mathcal{P}$ Process-Interaction-Model

|      |   |              |
|------|---|--------------|
| k1   | = | 0.454545E0;  |
| k2   | = | 0.909091E-2; |
| k3   | = | 0.9999E-4;   |
| k4   | = | 0.125E1;     |
| k5   | = | (40/21);     |
| k6   | = | 0.5E-1;      |
| k7   | = | 0.47619E0;   |
| k8   | = | 0.2E0;       |
| k9   | = | 0.333333E-2; |
| k10  | = | 0.999001E-3; |
| k11  | = | 0.363636E0;  |
| k12  | = | 0.1998E-2;   |
| k13  | = | (5/6);       |
| k14  | = | 0.47619E0;   |
| k15  | = | 0.4E-1;      |
| k16  | = | 0.380952E0;  |
| k17  | = | 0.25E0;      |
| k18  | = | 0.990099E-4; |
| k19  | = | 0.4995E-4;   |
| k20  | = | 0.990099E-4; |
| k21  | = | 0.727273E-1; |
| k22  | = | 0.39996E-4;  |
| k23  | = | (1/5);       |
| k24  | = | 0.285714E0;  |
| k25  | = | 0.19998E-4;  |
| k26  | = | 0.6E-1;      |
| k27  | = | 0.196262E-1; |
| k28  | = | 0.109989E-4; |
| k29  | = | 0.727273E0;  |
| k30  | = | (10/11);     |
| k31  | = | (10/11);     |
| k32  | = | 0.380952E0;  |
| k33  | = | 0.28125E0;   |
| k34  | = | 0.133333E0;  |
| k1d  | = | 0.454545E-1; |
| k2d  | = | 0.909091E-1; |
| k3d  | = | 0.9999E0;    |
| k4d  | = | 0.25E0;      |
| k5d  | = | (2/21);      |
| k6d  | = | 0.5E-1;      |
| k7d  | = | 0.238095E-1; |
| k8d  | = | 1.E-1;       |
| k9d  | = | 0.666667E-2; |
| k10d | = | 0.999001E0;  |
| k11d | = | 0.363636E-1; |
| k12d | = | 0.1998E1;    |
| k13d | = | (1/6);       |
| k14d | = | 0.238095E-1; |
| k15d | = | 0.4E-1;      |
| k16d | = | 0.190476E-1; |
| k17d | = | 0.25E0;      |
| k18d | = | 0.990099E-2; |
| k19d | = | 0.4995E-1;   |
| k20d | = | 0.990099E-2; |
| k21d | = | 0.727273E0;  |
| k22d | = | 0.39996E0;   |
| k23d | = | (4/5);       |
| k24d | = | 0.142857E-1; |
| k25d | = | 0.19998E0;   |
| k26d | = | 0.3E-1;      |
| k27d | = | 0.280374E0;  |
| k28d | = | 0.109989E0;  |
| k29d | = | 0.727273E-1; |
| k30d | = | (1/11);      |
| k31d | = | (1/11);      |
| k32d | = | 0.190476E-1; |
| k33d | = | 0.1875E-1;   |
| k34d | = | 0.666667E-1; |

Figure 2: Parameters for rule-based model of EGF and insulin crosstalk (adopted from [7])

Parameter table for *process 1* (binding)

| Process 2 | $k_{fw}$ | $k_{bw}$ | $k_{eq}$ | y |
|-----------|----------|----------|----------|---|
| 0         | k1       | k-1      | 10       | 1 |
| 1         | k2       | k-2      | 0.1      | 1 |

Parameter table for *process 2* (binding)

| Process 1 | $k_{fw}$ | $k_{bw}$ | $k_{eq}$ | y |
|-----------|----------|----------|----------|---|
| 0         | k1       | k-1      | 10       | 1 |
| 1         | k2       | k-2      | 0.1      | 1 |

Parameter table for *process 3* (modification)

| Process 1 | Process 2 | $k_{fw}$ | $k_{bw}$ | $k_{eq}$ | y |
|-----------|-----------|----------|----------|----------|---|
| 0         | 0         | k3       | k-3      | 0.0001   | 0 |
| 0         | 1         | k4       | k-4      | 5        | 1 |
| 1         | 0         | k4       | k-4      | 5        | 1 |
| 1         | 1         | k5       | k-5      | 20       | 1 |

Parameter table for *process 4* (modification)

| Process 1 | Process 2 | $k_{fw}$ | $k_{bw}$ | $k_{eq}$ | y |
|-----------|-----------|----------|----------|----------|---|
| 0         | 0         | k12      | k-12     | 0.001    | 0 |
| 0         | 1         | k13      | k-13     | 5        | 1 |
| 1         | 0         | k13      | k-13     | 5        | 1 |
| 1         | 1         | k14      | k-14     | 20       | 1 |

Parameter table for *process 5* (binding)

| Process 3 | $k_{fw}$ | $k_{bw}$ | $k_{eq}$ | y |
|-----------|----------|----------|----------|---|
| 0         | -        | -        | -        | 0 |
| 1         | k6       | k-6      | 1        | 1 |

Parameter table for *process 6* (modification)

| Process 5 | Process 15 | $k_{fw}$ | $k_{bw}$ | $k_{eq}$ | y |
|-----------|------------|----------|----------|----------|---|
| 0         | 0          | k18      | k-18     | 0.01     | 0 |
| 0         | 1          | k24      | k-24     | 20       | 1 |
| 1         | 0          | k7       | k-7      | 20       | 1 |
| 1         | 1          | -        | -        | -        | 1 |

Parameter table for *process 7* (binding)

| Process 6 | $k_{fw}$ | $k_{bw}$ | $k_{eq}$ | $y$ |
|-----------|----------|----------|----------|-----|
| 0         | -        | -        | -        | 0   |
| 1         | k8       | k-8      | 2        | 1   |

Parameter table for *process 8* (binding)

| Process 9 | $k_{fw}$ | $k_{bw}$ | $k_{eq}$ | $y$ |
|-----------|----------|----------|----------|-----|
| 0         | k9       | k-9      | 0.5      | 1   |
| 1         | k10      | k-10     | 0.001    | 0   |

Parameter table for *process 9* (modification)

| Process 8 | $k_{fw}$ | $k_{bw}$ | $k_{eq}$ | $y$ |
|-----------|----------|----------|----------|-----|
| 0         | k19      | k-19     | 0.001    | 0   |
| 1         | k11      | k-11     | 10       | 1   |

Parameter table for *process 10* (binding)

| Process 4 | $k_{fw}$ | $k_{bw}$ | $k_{eq}$ | $y$ |
|-----------|----------|----------|----------|-----|
| 0         | -        | -        | -        | 0   |
| 1         | k15      | k-15     | 1        | 1   |

Parameter table for *process 11* (modification)

| Process 10 | $k_{fw}$ | $k_{bw}$ | $k_{eq}$ | $y$ |
|------------|----------|----------|----------|-----|
| 0          | k20      | k-20     | 0.01     | 0   |
| 1          | k16      | k-16     | 20       | 1   |

Parameter table for *process 12* (binding)

| Process 11 | $k_{fw}$ | $k_{bw}$ | $k_{eq}$ | $y$ |
|------------|----------|----------|----------|-----|
| 0          | -        | -        | -        | 0   |
| 1          | k17      | k-17     | 1        | 1   |

Parameter table for *process 13* (binding)

| Process 18 | $k_{fw}$ | $k_{bw}$ | $k_{eq}$ | $y$ |
|------------|----------|----------|----------|-----|
| 0          | k21      | k-21     | 0.1      | 1   |
| 1          | k30      | k-30     | 10       | 1   |

Parameter table for *process 14* (modification)

| Process 18 | $k_{fw}$ | $k_{bw}$ | $k_{eq}$ | $y$ |
|------------|----------|----------|----------|-----|
| 0          | k22      | k-22     | 0.0001   | 0   |
| 1          | k31      | k-31     | 10       | 1   |

Parameter table for *process 15* (binding)

| Process 14 | $k_{fw}$ | $k_{bw}$ | $k_{eq}$ | y |
|------------|----------|----------|----------|---|
| 0          | -        | -        | -        | 0 |
| 1          | k23      | k-23     | 0.25     | 1 |

Parameter table for *process 16* (modification)

| Process 18 | $k_{fw}$ | $k_{bw}$ | $k_{eq}$ | y |
|------------|----------|----------|----------|---|
| 0          | k25      | k-25     | 0.0001   | 0 |
| 1          | k33      | k-33     | 15       | 1 |

Parameter table for *process 17* (binding)

| Process 16 | $k_{fw}$ | $k_{bw}$ | $k_{eq}$ | y |
|------------|----------|----------|----------|---|
| 0          | -        | -        | -        | 0 |
| 1          | k26      | k-26     | 2        | 1 |

Parameter table for *process 18* (dimerization)

| Process 13 | Process 13' | $k_{fw}$ | $k_{bw}$ | $k_{eq}$ | y |
|------------|-------------|----------|----------|----------|---|
| 0          | 0           | k28      | k-28     | 0.0001   | 0 |
| 0          | 1           | k27      | k-27     | 0.07     | - |
| 1          | 0           | -        | -        | -        | - |
| 1          | 1           | k29      | k-29     | 10       | 1 |
